# Supplementary material for: Temporal Dynamics of the Intestinal Microbiome Following Short-Term Dietary Restriction
Source: MDPI journal article supplement (doi:10.3390/nu14142785), 2022-07-06
Supplement: s1 [file s1]

Supplemental Figures/Tables

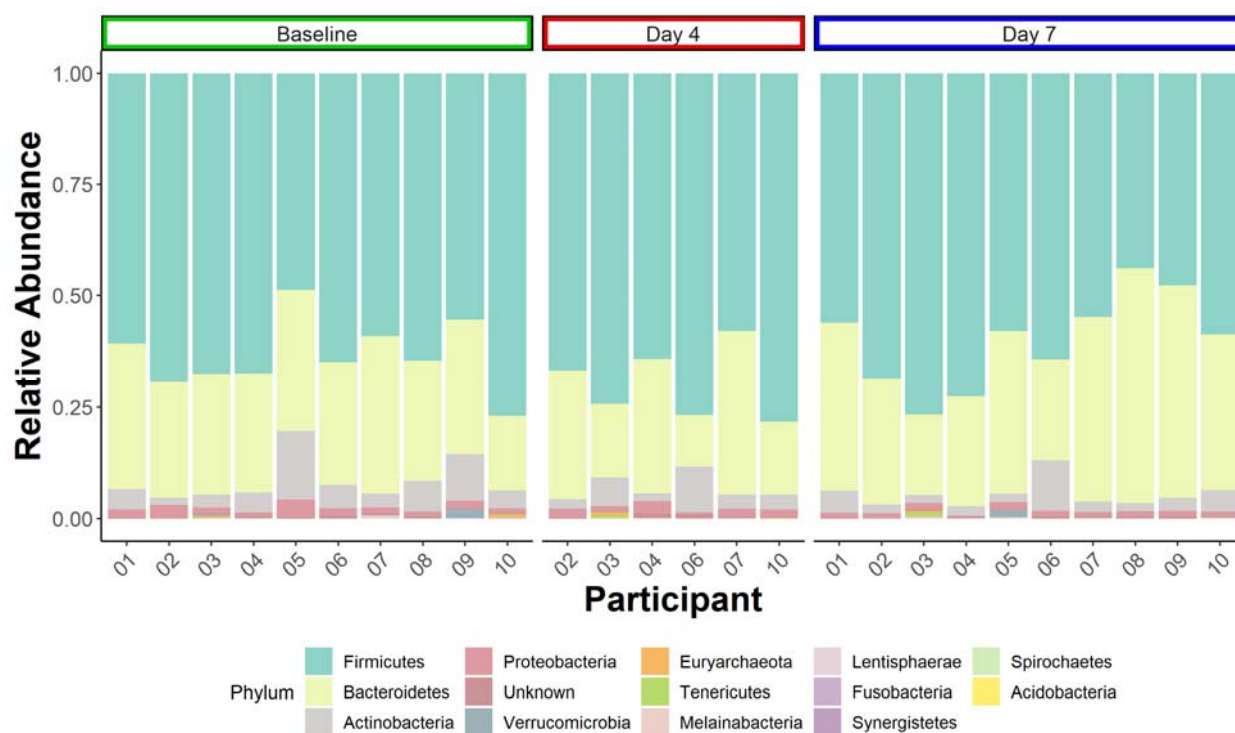

**Supplemental Figure S1.** Phylum-level Diversity. The relative abundance of each phylum is depicted for each participant at each time-point.

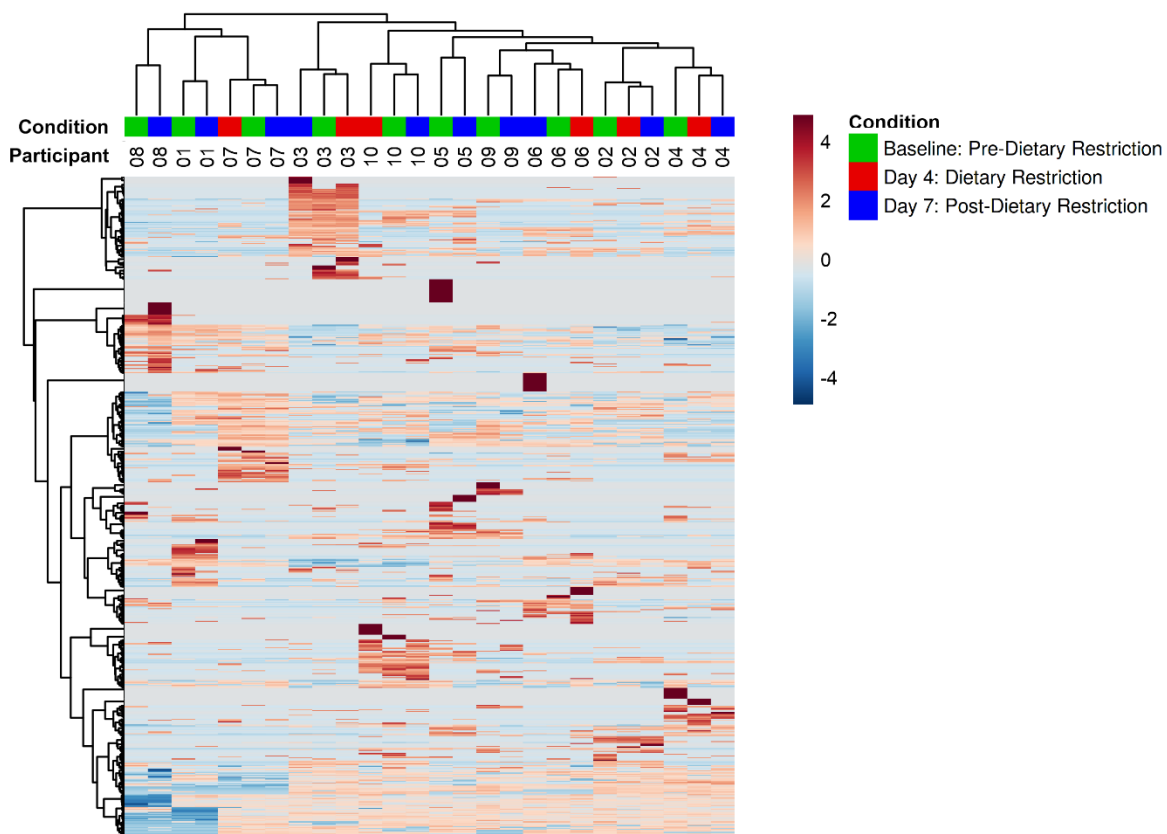

**Supplemental Figure S2.** Hierarchical clustering of unfiltered species. Species abundance patterns group by patient rather than condition.

**Supplemental Table S1.** Species PIME prevalence filtering output. Random forests were built at sequential prevalence intervals to determine the ideal cut off value. Out-of-bin (OOB) error rate of 0% was achieved at a 70% prevalence cut off. 74,291,605 reads corresponding to 136 species were present above this filtering threshold.

| Prevalence Interval (%) | OOB Error Rate (%) | OTUs (N) | Sequences (N) |
|-------------------------|--------------------|----------|---------------|
| 5                       | 96.15              | 681      | 91,410,253    |
| 10                      | 92.31              | 530      | 90,013,248    |
| 15                      | 96.15              | 530      | 90,013,248    |
| 20                      | 92.31              | 354      | 88,450,002    |
| 25                      | 84.62              | 354      | 88,450,002    |
| 30                      | 80.77              | 313      | 86,738,175    |
| 35                      | 53.85              | 268      | 86,252,647    |
| 40                      | 30.77              | 241      | 83,549,022    |
| 45                      | 46.15              | 241      | 83,549,022    |
| 50                      | 7.69               | 191      | 80,761,545    |
| 55                      | 3.85               | 191      | 80,761,545    |
| 60                      | 3.85               | 176      | 78,332,889    |
| 65                      | 7.69               | 176      | 78,332,889    |
| 70                      | 0                  | 136      | 74,291,605    |
| 75                      | 3.85               | 136      | 74,291,605    |
| 80                      | 0                  | 128      | 68,893,931    |
| 85                      | 0                  | 104      | 67,269,799    |
| 90                      | 0                  | 92       | 59,055,438    |
| 95                      | 0                  | 92       | 59,055,438    |

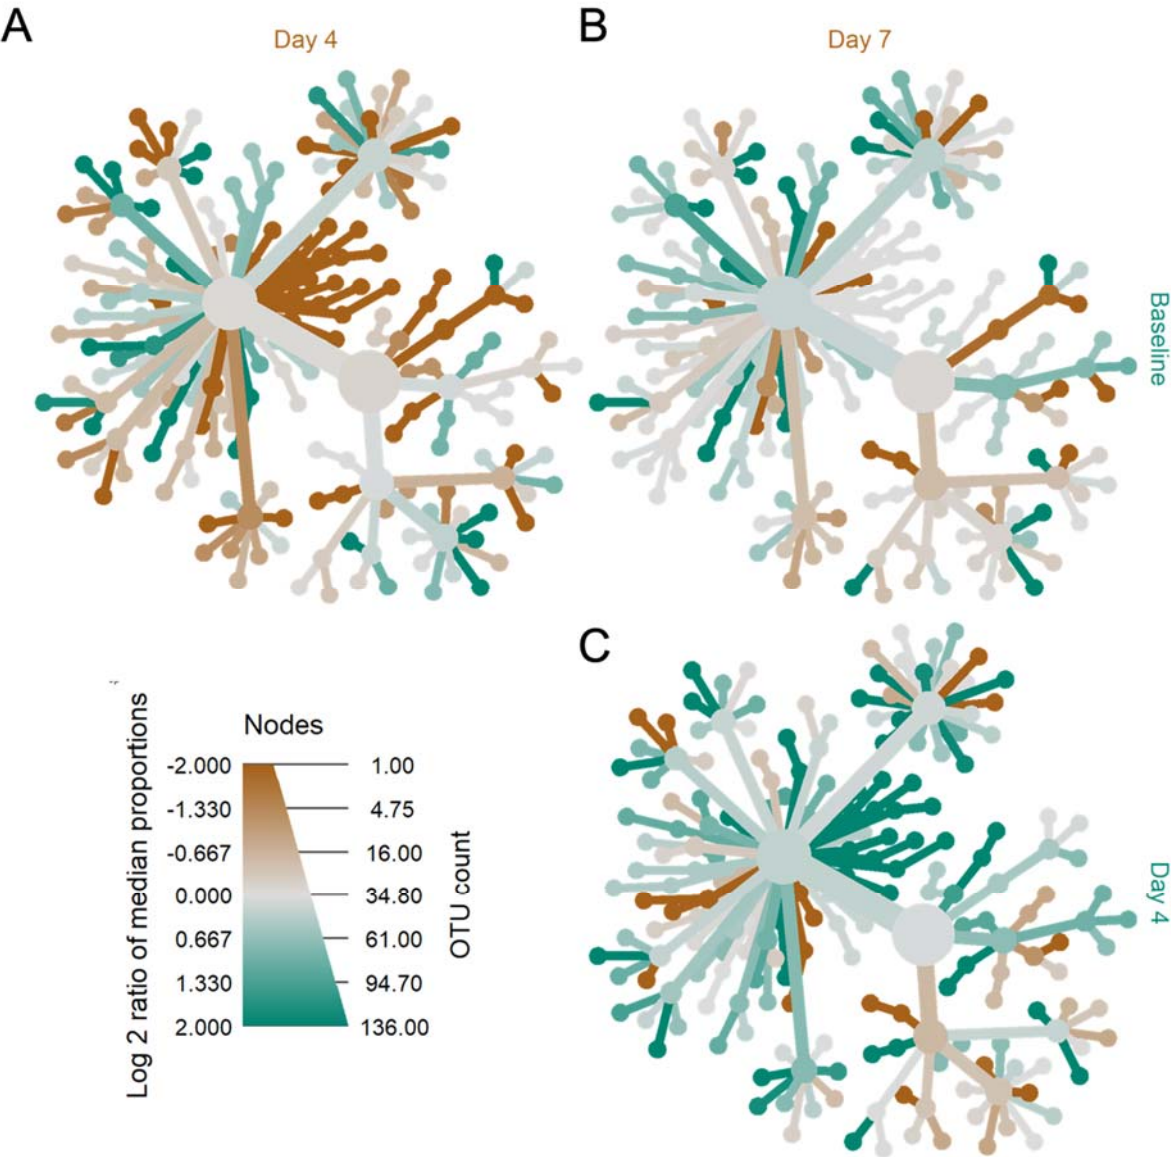

D

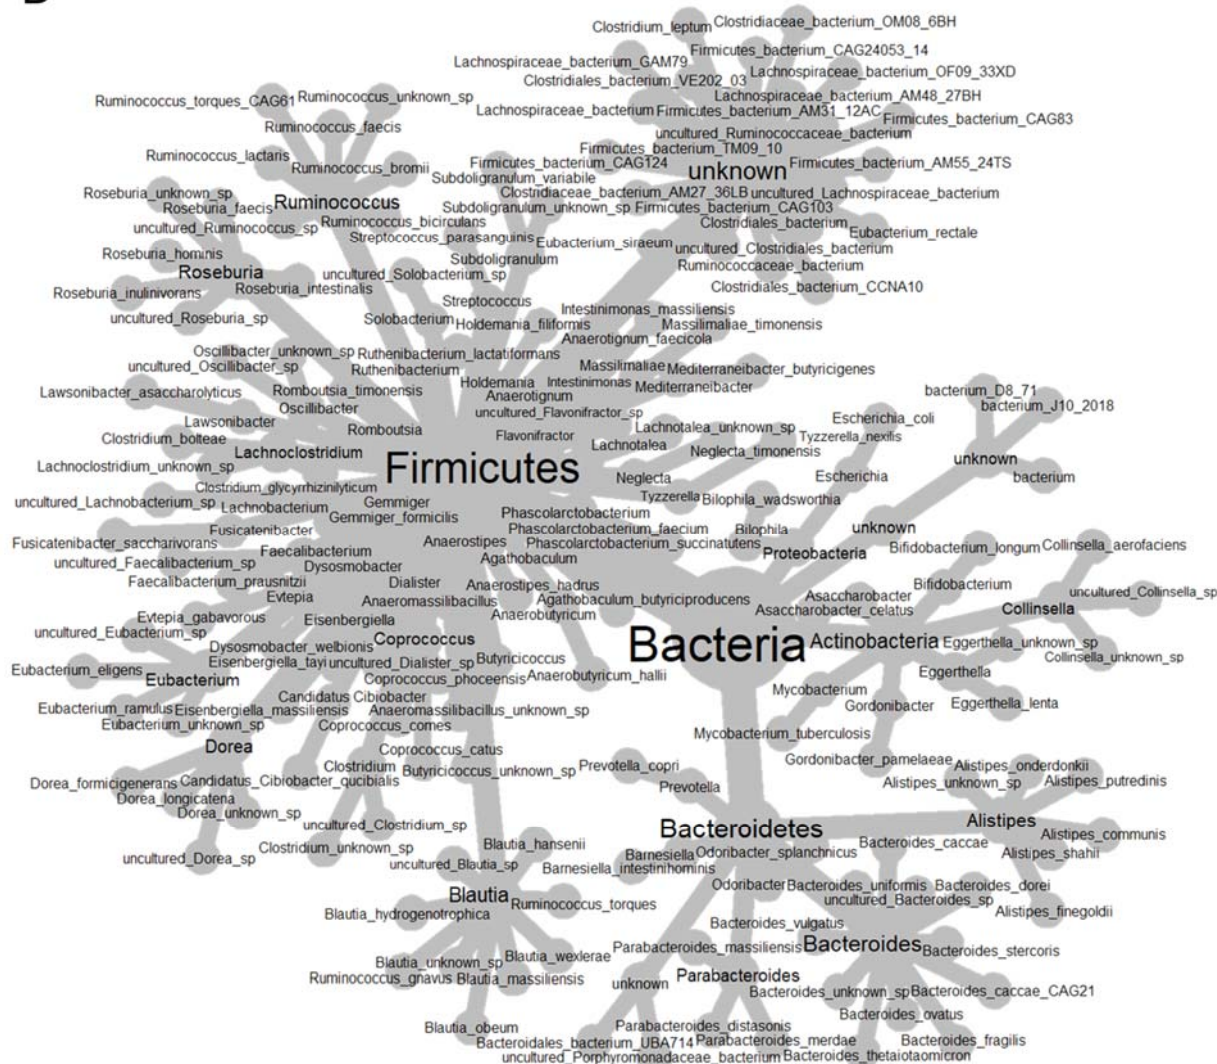

**Supplemental Figure S3.** Heat tree comparing condition variation at all taxonomy levels. Pairwise comparisons between the three conditions (A-C). Size of each node represents the number of species contained within that group. The color of each node shows the favored condition. Comparisons were performed using Wilcoxon rank-sum test for median read proportion of paired conditions. Heat tree taxa legend (D). Kingdom, phylum, genus, and species taxonomy levels were included.

**Supplemental Table S2.** Significantly different species between Baseline and Day-4 conditions (FDR  $p < 0.05$ ).

| Kingdom  | Phylum         | Genus                  | Species                                  | Effect Size | FDR p-value |
|----------|----------------|------------------------|------------------------------------------|-------------|-------------|
| Bacteria | Bacteroidetes  | Bacteroides            | Bacteroides_stercoris                    | -4.92       | <0.001      |
| Bacteria | Firmicutes     | Faecalibacterium       | uncultured_Faecalibacterium_sp           | -4.73       | <0.001      |
| Bacteria | Bacteroidetes  | Parabacteroides        | Parabacteroides_massiliensis             | -4.65       | <0.001      |
| Bacteria | Firmicutes     | Roseburia              | Roseburia_unknown_sp                     | -3.98       | <0.001      |
| Bacteria | unknown        | unknown                | bacterium_D8_71                          | -3.26       | <0.001      |
| Bacteria | Bacteroidetes  | Bacteroides            | Bacteroides_dorei                        | -2.81       | <0.001      |
| Bacteria | Firmicutes     | Eubacterium            | Eubacterium_unknown_sp                   | -2.66       | <0.001      |
| Bacteria | Firmicutes     | Candidatus Cibiobacter | Candidatus_Cibiobacter_quci bialis       | -2.50       | 0.002       |
| Bacteria | Firmicutes     | Butyricicoccus         | Butyricicoccus_unknown_sp                | -2.43       | 0.002       |
| Bacteria | Firmicutes     | unknown                | Lachnospiraceae_bacterium_GAM79          | -2.14       | 0.001       |
| Bacteria | Bacteroidetes  | Bacteroides            | Bacteroides_fragilis                     | -2.12       | 0.002       |
| Bacteria | Firmicutes     | Ruminococcus           | Ruminococcus_bicirculans                 | -2.03       | 0.002       |
| Bacteria | Firmicutes     | Faecalibacterium       | Faecalibacterium_prausnitzii             | -1.58       | 0.004       |
| Bacteria | Firmicutes     | Anaerostipes           | Anaerostipes_hadrus                      | -1.57       | 0.003       |
| Bacteria | Firmicutes     | Subdoligranulum        | Subdoligranulum_unknown_sp               | -1.42       | 0.037       |
| Bacteria | unknown        | unknown                | bacterium_J10_2018                       | -1.41       | 0.012       |
| Bacteria | Firmicutes     | Roseburia              | Roseburia_intestinalis                   | -1.40       | 0.010       |
| Bacteria | Firmicutes     | Dialister              | uncultured_Dialister_sp                  | -1.39       | 0.005       |
| Bacteria | Firmicutes     | unknown                | uncultured_Lachnospiraceae_bacterium     | -1.34       | 0.005       |
| Bacteria | Bacteroidetes  | Bacteroides            | uncultured_Bacteroides_sp                | -1.32       | 0.011       |
| Bacteria | Firmicutes     | Anaerobutyricum        | Anaerobutyricum_hallii                   | -1.24       | 0.025       |
| Bacteria | Bacteroidetes  | Bacteroides            | Bacteroides_ovatus                       | -1.20       | 0.028       |
| Bacteria | Firmicutes     | Ruminococcus           | Ruminococcus_unknown_sp                  | -1.17       | 0.015       |
| Bacteria | Firmicutes     | Blautia                | Blautia_wexlerae                         | -1.12       | 0.016       |
| Bacteria | Firmicutes     | Blautia                | uncultured_Blautia_sp                    | -1.12       | 0.025       |
| Bacteria | Firmicutes     | Eubacterium            | uncultured_Eubacterium_sp                | -1.09       | 0.040       |
| Bacteria | Firmicutes     | unknown                | uncultured_Ruminococcaceae_bacterium     | -1.08       | 0.034       |
| Bacteria | Firmicutes     | Dysosmobacter          | Dysosmobacter_welbionis                  | -1.07       | 0.013       |
| Bacteria | Firmicutes     | Gemmiger               | Gemmiger_formicilis                      | -1.05       | 0.024       |
| Bacteria | Bacteroidetes  | Bacteroides            | Bacteroides_vulgatus                     | -1.02       | 0.017       |
| Bacteria | Bacteroidetes  | Bacteroides            | Bacteroides_thetaiotaomicron             | -1.00       | 0.030       |
| Bacteria | Firmicutes     | Clostridium            | uncultured_Clostridium_sp                | -0.96       | 0.031       |
| Bacteria | Firmicutes     | unknown                | Clostridiales_bacterium_VE20_2_03        | -0.96       | 0.015       |
| Bacteria | Firmicutes     | Fusicatenibacter       | Fusicatenibacter_saccharivora ns         | -0.87       | 0.040       |
| Bacteria | Bacteroidetes  | unknown                | uncultured_Porphyrimonada ceae_bacterium | -0.86       | 0.047       |
| Bacteria | Firmicutes     | Blautia                | Blautia_obeum                            | -0.84       | 0.032       |
| Bacteria | Actinobacteria | Mycobacterium          | Mycobacterium_tuberculosis               | 1.46        | 0.043       |
| Bacteria | Firmicutes     | Massilimaliae          | Massilimaliae_timonensis                 | 1.59        | 0.030       |
| Bacteria | Firmicutes     | Intestinimonas         | Intestinimonas_massiliensis              | 1.73        | 0.045       |
| Bacteria | Firmicutes     | Dorea                  | uncultured_Dorea_sp                      | 1.77        | 0.034       |

|          |                |                       |                                     |      |        |
|----------|----------------|-----------------------|-------------------------------------|------|--------|
| Bacteria | Proteobacteria | Escherichia           | Escherichia_coli                    | 1.81 | 0.030  |
| Bacteria | Firmicutes     | Mediterraneibacter    | Mediterraneibacter_butyricigenes    | 1.81 | 0.032  |
| Bacteria | Firmicutes     | Blautia               | Blautia_hydrogenotrophica           | 1.81 | 0.032  |
| Bacteria | Firmicutes     | Lachnoclostridium     | Clostridium_glycyrrhizinilyticum    | 1.84 | 0.022  |
| Bacteria | Firmicutes     | Flavonifractor        | uncultured_Flavonifractor_sp        | 1.85 | 0.025  |
| Bacteria | Firmicutes     | Tyzzzerella           | Tyzzzerella_nexilis                 | 1.87 | 0.028  |
| Bacteria | Firmicutes     | Holdemania            | Holdemania_filiformis               | 1.95 | 0.031  |
| Bacteria | Firmicutes     | unknown               | Firmicutes_bacterium_AM31_12AC      | 1.95 | 0.032  |
| Bacteria | Firmicutes     | unknown               | Eubacterium_siraeum                 | 1.97 | 0.035  |
| Bacteria | Firmicutes     | unknown               | Firmicutes_bacterium_CAG103         | 2.05 | 0.031  |
| Bacteria | unknown        | unknown               | bacterium                           | 2.08 | 0.026  |
| Bacteria | Bacteroidetes  | Barnesiella           | Barnesiella_intestinihominis        | 2.21 | 0.025  |
| Bacteria | Bacteroidetes  | Alistipes             | Alistipes_finegoldii                | 2.23 | 0.026  |
| Bacteria | Actinobacteria | Collinsella           | Collinsella_unknown_sp              | 2.35 | 0.021  |
| Bacteria | Firmicutes     | Anaerotignum          | Anaerotignum_faecicola              | 2.42 | 0.024  |
| Bacteria | Bacteroidetes  | Alistipes             | Alistipes_onderdonkii               | 3.05 | <0.001 |
| Bacteria | Firmicutes     | Neglecta              | Neglecta_timonensis                 | 3.93 | <0.001 |
| Bacteria | Firmicutes     | unknown               | Firmicutes_bacterium_CAG83          | 4.09 | <0.001 |
| Bacteria | Firmicutes     | Phascolarctobacterium | Phascolarctobacterium_succinatutens | 4.21 | <0.001 |
| Bacteria | Firmicutes     | Lachnospiraea         | Lachnospiraea_unknown_sp            | 4.23 | <0.001 |
| Bacteria | Firmicutes     | Coproccoccus          | Coproccoccus_comes                  | 4.28 | <0.001 |
| Bacteria | Firmicutes     | Phascolarctobacterium | Phascolarctobacterium_faecium       | 4.72 | <0.001 |
| Bacteria | Firmicutes     | Ruminococcus          | Ruminococcus_torques_CAG61          | 5.13 | <0.001 |



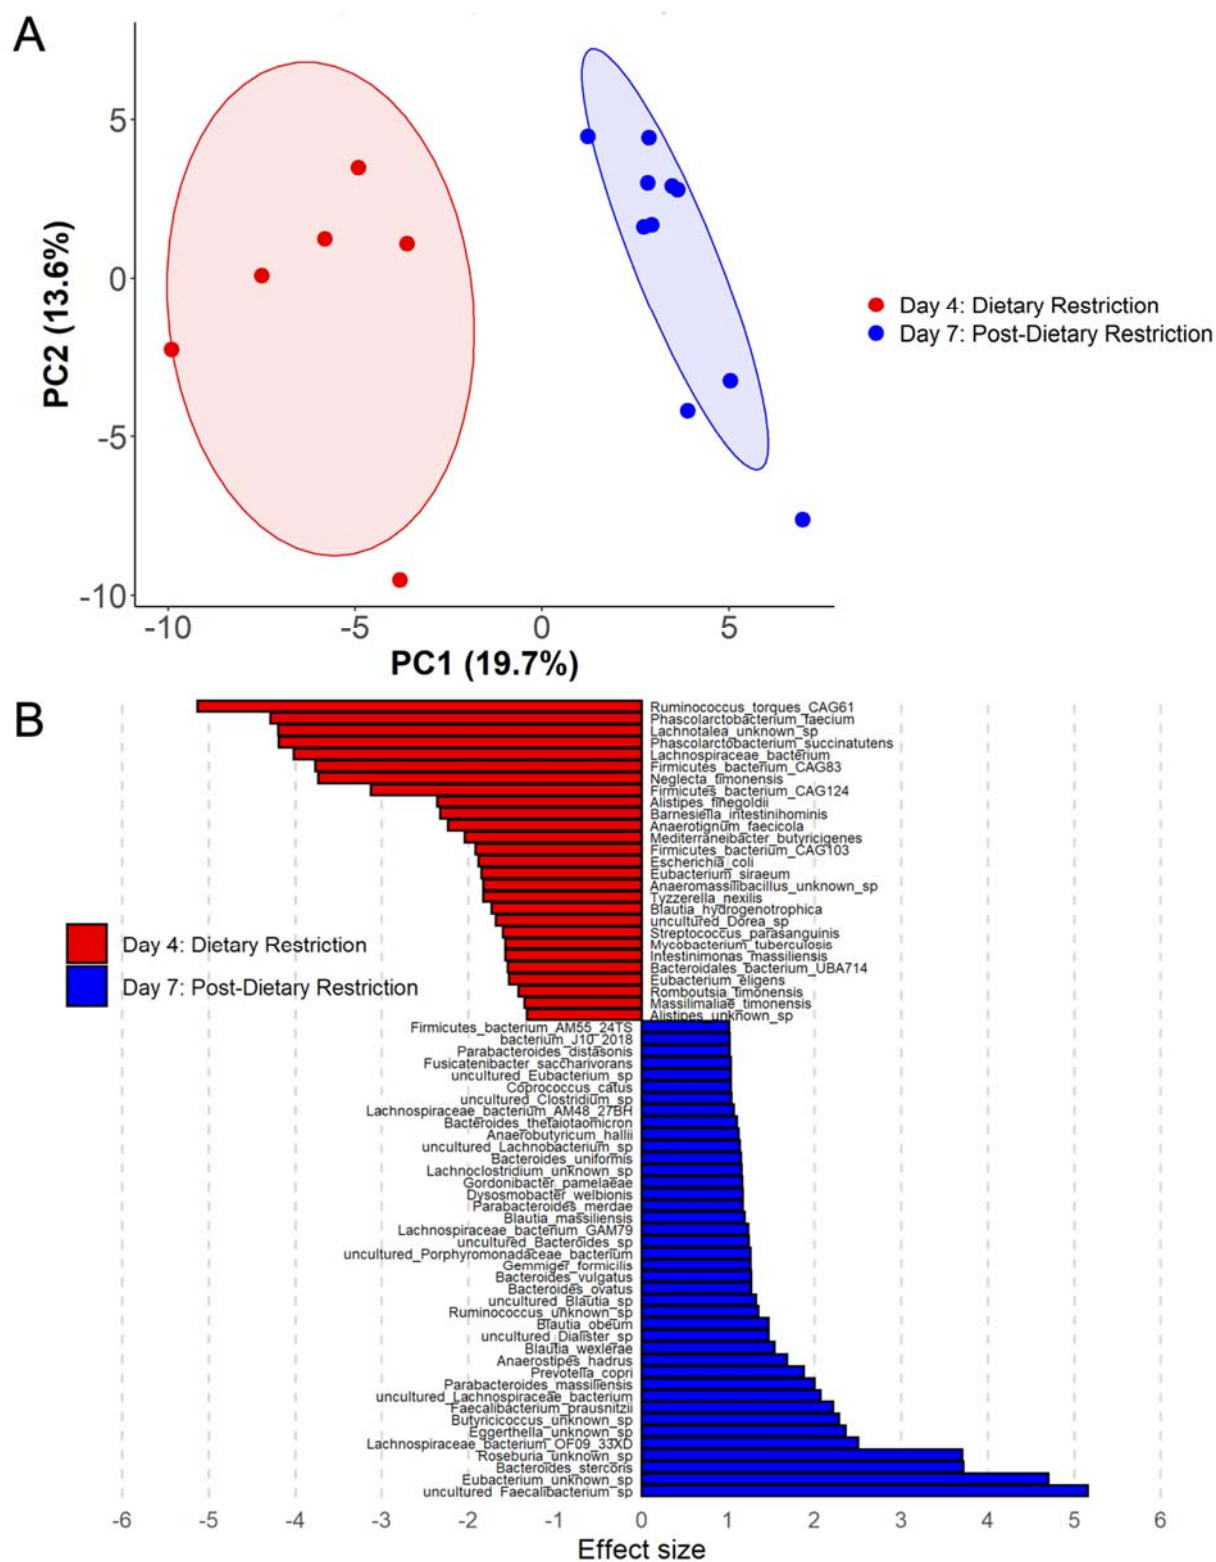

**Supplemental Figure S4.** Day-4 v. Day-7. Principal component analysis of species present between the two conditions (A). Effect size graph of significantly different species (FDR  $p < 0.05$ , effect size  $> 1$ ) (B).



**Supplemental Table S3.** Significantly different species between Day-4 and Day-7 conditions (FDR  $p < 0.05$ ).

| Kingdom  | Phylum         | Genus                 | Species                                 | Effect Size | FDR p-value |
|----------|----------------|-----------------------|-----------------------------------------|-------------|-------------|
| Bacteria | Firmicutes     | Ruminococcus          | Ruminococcus_torques_CAG6<br>1          | -5.13       | <0.001      |
| Bacteria | Firmicutes     | Phascolarctobacterium | Phascolarctobacterium_faeci<br>m        | -4.29       | <0.001      |
| Bacteria | Firmicutes     | Lachnотalea           | Lachnотalea_unknown_sp                  | -4.20       | <0.001      |
| Bacteria | Firmicutes     | Phascolarctobacterium | Phascolarctobacterium_succin<br>atutens | -4.19       | <0.001      |
| Bacteria | Firmicutes     | unknown               | Lachnospiraceae_bacterium               | -4.02       | <0.001      |
| Bacteria | Firmicutes     | unknown               | Firmicutes_bacterium_CAG83              | -3.77       | <0.001      |
| Bacteria | Firmicutes     | Neglecta              | Neglecta_timonensis                     | -3.74       | <0.001      |
| Bacteria | Firmicutes     | unknown               | Firmicutes_bacterium_CAG12<br>4         | -3.13       | <0.001      |
| Bacteria | Bacteroidetes  | Alistipes             | Alistipes_finegoldii                    | -2.36       | 0.032       |
| Bacteria | Bacteroidetes  | Barnesiella           | Barnesiella_intestinihominis            | -2.32       | 0.024       |
| Bacteria | Firmicutes     | Anaerotignum          | Anaerotignum_faecicola                  | -2.24       | 0.029       |
| Bacteria | Firmicutes     | Mediterraneibacter    | Mediterraneibacter_butyrice<br>nes      | -2.04       | 0.038       |
| Bacteria | Firmicutes     | unknown               | Firmicutes_bacterium_CAG10<br>3         | -1.92       | 0.032       |
| Bacteria | Proteobacteria | Escherichia           | Escherichia_coli                        | -1.88       | 0.029       |
| Bacteria | Firmicutes     | unknown               | Eubacterium_siraeum                     | -1.85       | 0.032       |
| Bacteria | Firmicutes     | Anaeromassilibacillus | Anaeromassilibacillus_unkno<br>wn_sp    | -1.83       | 0.035       |
| Bacteria | Firmicutes     | Tyzzereella           | Tyzzereella_nexilis                     | -1.83       | 0.027       |
| Bacteria | Firmicutes     | Blautia               | Blautia_hydrogenotrophica               | -1.73       | 0.042       |
| Bacteria | Firmicutes     | Dorea                 | uncultured_Dorea_sp                     | -1.68       | 0.036       |
| Bacteria | Firmicutes     | Streptococcus         | Streptococcus_parasanguinis             | -1.60       | 0.041       |
| Bacteria | Actinobacteria | Mycobacterium         | Mycobacterium_tuberculosis              | -1.58       | 0.032       |
| Bacteria | Firmicutes     | Intestinimonas        | Intestinimonas_massiliensis             | -1.57       | 0.044       |
| Bacteria | Bacteroidetes  | unknown               | Bacteroidales_bacterium_UBA<br>714      | -1.54       | 0.047       |
| Bacteria | Firmicutes     | Eubacterium           | Eubacterium_eligens                     | -1.53       | 0.034       |
| Bacteria | Firmicutes     | Romboutsia            | Romboutsia_timonensis                   | -1.42       | 0.044       |
| Bacteria | Firmicutes     | Massimalia            | Massimalia_timonensis                   | -1.35       | 0.037       |
| Bacteria | Bacteroidetes  | Alistipes             | Alistipes_unknown_sp                    | -1.32       | 0.048       |
| Bacteria | Actinobacteria | Eggerthella           | Eggerthella_lenta                       | 0.72        | 0.046       |
| Bacteria | Firmicutes     | Blautia               | Blautia_unknown_sp                      | 0.89        | 0.043       |
| Bacteria | Firmicutes     | unknown               | Clostridiales_bacterium_VE20<br>2_03    | 0.98        | 0.022       |
| Bacteria | unknown        | unknown               | bacterium_J10_2018                      | 1.01        | 0.019       |
| Bacteria | Bacteroidetes  | Parabacteroides       | Parabacteroides_distasonis              | 1.01        | 0.026       |
| Bacteria | Firmicutes     | Fusicatenibacter      | Fusicatenibacter_saccharivora<br>ns     | 1.03        | 0.020       |
| Bacteria | Firmicutes     | Eubacterium           | uncultured_Eubacterium_sp               | 1.03        | 0.029       |
| Bacteria | Firmicutes     | Coprococcus           | Coprococcus_catus                       | 1.03        | 0.023       |
| Bacteria | Firmicutes     | Clostridium           | uncultured_Clostridium_sp               | 1.04        | 0.017       |
| Bacteria | Bacteroidetes  | Bacteroides           | Bacteroides_thetaiotaomicron            | 1.10        | 0.013       |
| Bacteria | Firmicutes     | Anaerobutyricum       | Anaerobutyricum_hallii                  | 1.12        | 0.020       |

|          |                |                  |                                          |      |        |
|----------|----------------|------------------|------------------------------------------|------|--------|
| Bacteria | Firmicutes     | Lachnobacterium  | uncultured_Lachnobacterium_sp            | 1.14 | 0.013  |
| Bacteria | Bacteroidetes  | Bacteroides      | Bacteroides_uniformis                    | 1.15 | 0.018  |
| Bacteria | Firmicutes     | Dysosmobacter    | Dysosmobacter_welbionis                  | 1.17 | 0.011  |
| Bacteria | Firmicutes     | Blautia          | Blautia_massiliensis                     | 1.19 | 0.015  |
| Bacteria | Bacteroidetes  | Bacteroides      | uncultured_Bacteroides_sp                | 1.24 | 0.010  |
| Bacteria | Bacteroidetes  | unknown          | uncultured_Porphyromonada_ceae_bacterium | 1.26 | 0.011  |
| Bacteria | Firmicutes     | Gemmiger         | Gemmiger_formicilis                      | 1.26 | 0.009  |
| Bacteria | Bacteroidetes  | Bacteroides      | Bacteroides_vulgatus                     | 1.26 | 0.011  |
| Bacteria | Bacteroidetes  | Bacteroides      | Bacteroides_ovatus                       | 1.27 | 0.010  |
| Bacteria | Firmicutes     | Blautia          | uncultured_Blautia_sp                    | 1.32 | 0.009  |
| Bacteria | Firmicutes     | Ruminococcus     | Ruminococcus_unknown_sp                  | 1.35 | 0.008  |
| Bacteria | Firmicutes     | Blautia          | Blautia_obeum                            | 1.47 | 0.008  |
| Bacteria | Firmicutes     | Dialister        | uncultured_Dialister_sp                  | 1.47 | 0.005  |
| Bacteria | Firmicutes     | Blautia          | Blautia_wexlerae                         | 1.53 | 0.004  |
| Bacteria | Firmicutes     | Anaerostipes     | Anaerostipes_hadrus                      | 1.68 | 0.001  |
| Bacteria | Bacteroidetes  | Prevotella       | Prevotella_copri                         | 1.88 | 0.002  |
| Bacteria | Bacteroidetes  | Parabacteroides  | Parabacteroides_massiliensis             | 2.00 | 0.002  |
| Bacteria | Firmicutes     | unknown          | uncultured_Lachnospiraceae_bacterium     | 2.07 | <0.001 |
| Bacteria | Firmicutes     | Faecalibacterium | Faecalibacterium_prausnitzii             | 2.21 | 0.001  |
| Bacteria | Firmicutes     | Butyricicoccus   | Butyricicoccus_unknown_sp                | 2.28 | 0.001  |
| Bacteria | Actinobacteria | Eggerthella      | Eggerthella_unknown_sp                   | 2.36 | 0.001  |
| Bacteria | Firmicutes     | unknown          | Lachnospiraceae_bacterium_OF09_33XD      | 2.50 | 0.002  |
| Bacteria | Firmicutes     | Roseburia        | Roseburia_unknown_sp                     | 3.71 | <0.001 |
| Bacteria | Bacteroidetes  | Bacteroides      | Bacteroides_stercoris                    | 3.72 | <0.001 |
| Bacteria | Firmicutes     | Eubacterium      | Eubacterium_unknown_sp                   | 4.70 | <0.001 |
| Bacteria | Firmicutes     | Faecalibacterium | uncultured_Faecalibacterium_sp           | 5.16 | <0.001 |

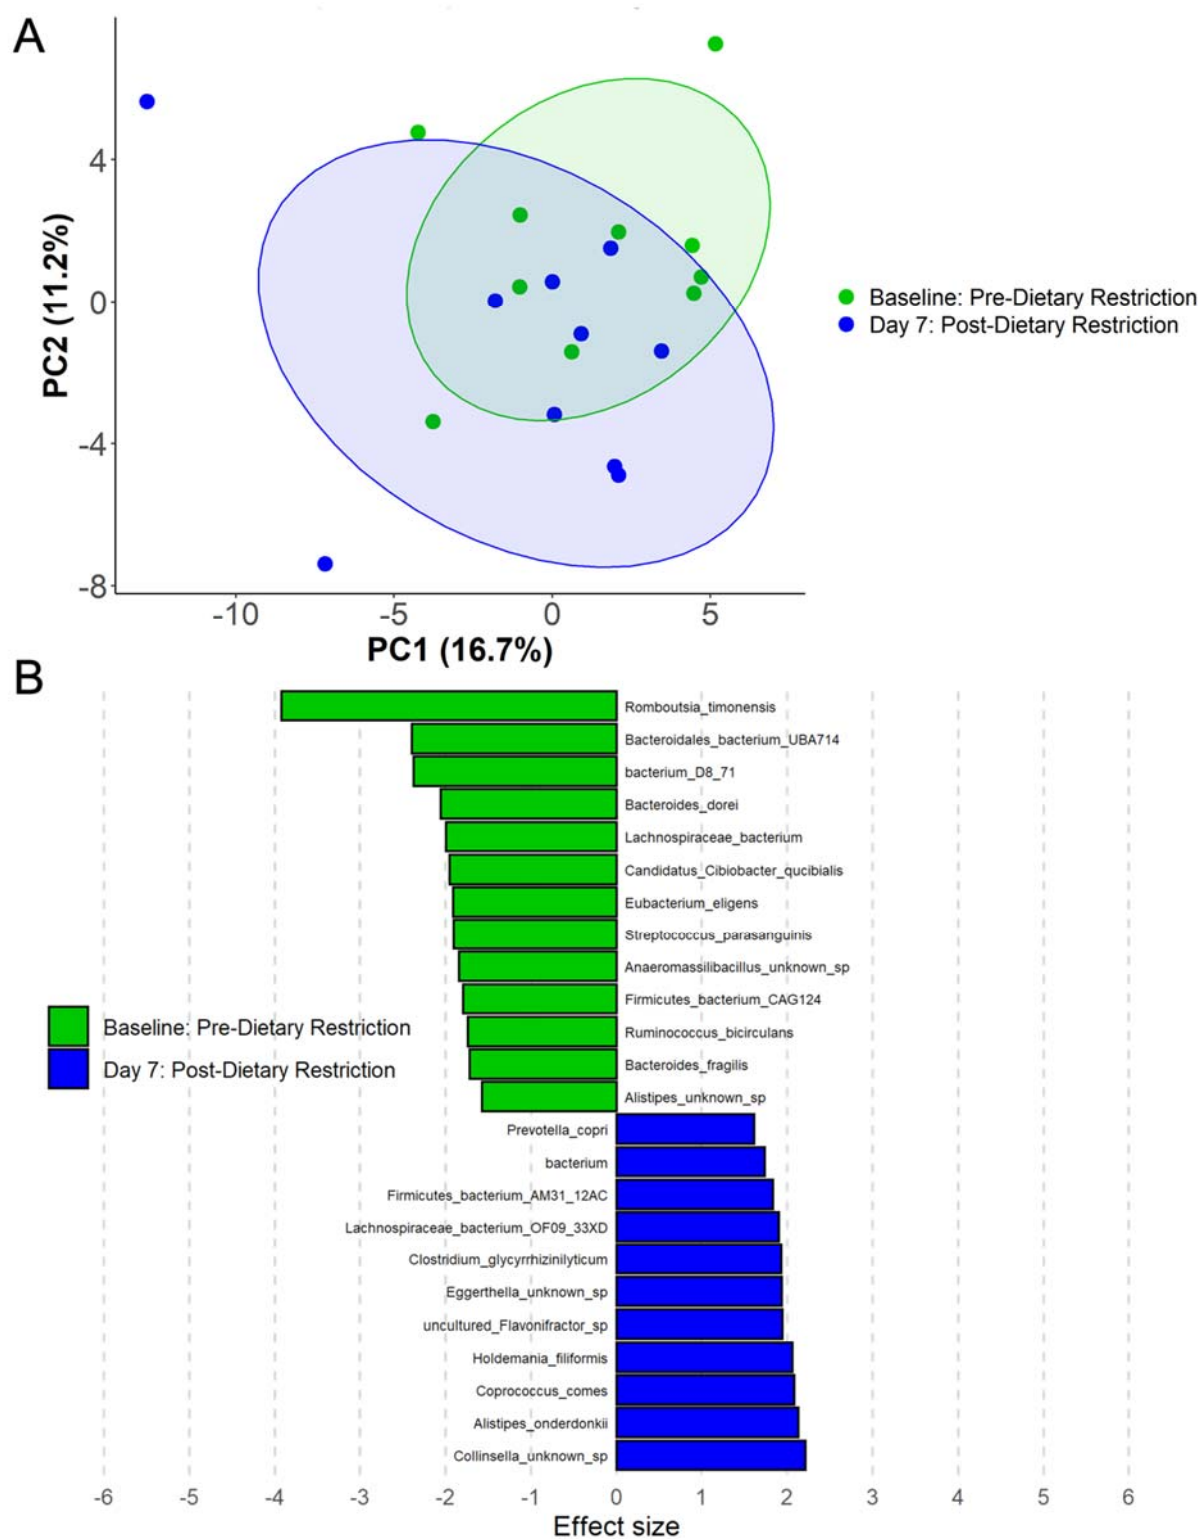

**Supplemental Figure S5.** Baseline v. Day-7. Principal component analysis of species present between the two conditions (A). Effect size graph of significantly different species (FDR  $p < 0.05$ , effect size  $> 1$ ) (B).

**Supplemental Table S4.** Significantly different species between Baseline and Day-7 conditions (FDR  $p < 0.05$ ).

| Kingdom  | Phylum         | Genus                  | Species                        | Effect Size | FDR p-value |
|----------|----------------|------------------------|--------------------------------|-------------|-------------|
| Bacteria | Firmicutes     | Romboutsia             | Romboutsia_timonensis          | -3.92       | <0.001      |
|          |                |                        | Bacteroidales_bacterium_UBA    |             |             |
| Bacteria | Bacteroidetes  | unknown                | 714                            | -2.39       | 0.002       |
| Bacteria | unknown        | unknown                | bacterium_D8_71                | -2.38       | <0.001      |
| Bacteria | Bacteroidetes  | Bacteroides            | Bacteroides_dorei              | -2.05       | 0.002       |
| Bacteria | Firmicutes     | unknown                | Lachnospiraceae_bacterium      | -1.99       | 0.001       |
|          |                |                        | Candidatus_Cibiobacter_quci    |             |             |
| Bacteria | Firmicutes     | Candidatus Cibiobacter | bialis                         | -1.95       | 0.003       |
| Bacteria | Firmicutes     | Eubacterium            | Eubacterium_eligens            | -1.91       | 0.004       |
| Bacteria | Firmicutes     | Streptococcus          | Streptococcus_parasanguinis    | -1.91       | 0.005       |
|          |                |                        | Anaeromassilibacillus_unkno    |             |             |
| Bacteria | Firmicutes     | Anaeromassilibacillus  | wn_sp                          | -1.85       | 0.004       |
|          |                |                        | Firmicutes_bacterium_CAG12     |             |             |
| Bacteria | Firmicutes     | unknown                | 4                              | -1.79       | 0.005       |
| Bacteria | Firmicutes     | Ruminococcus           | Ruminococcus_bicirculans       | -1.74       | 0.008       |
| Bacteria | Bacteroidetes  | Bacteroides            | Bacteroides_fragilis           | -1.72       | 0.005       |
| Bacteria | Bacteroidetes  | Alistipes              | Alistipes_unknown_sp           | -1.57       | 0.008       |
| Bacteria | Bacteroidetes  | Prevotella             | Prevotella_copri               | 1.61        | 0.004       |
| Bacteria | unknown        | unknown                | bacterium                      | 1.73        | 0.004       |
|          |                |                        | Firmicutes_bacterium_AM31_     |             |             |
| Bacteria | Firmicutes     | unknown                | 12AC                           | 1.83        | 0.004       |
|          |                |                        | Lachnospiraceae_bacterium_     |             |             |
| Bacteria | Firmicutes     | unknown                | OF09_33XD                      | 1.90        | 0.001       |
|          |                |                        | Clostridium_glycyrrhizinilytic |             |             |
| Bacteria | Firmicutes     | Lachnoclostridium      | um                             | 1.93        | 0.002       |
| Bacteria | Actinobacteria | Eggerthella            | Eggerthella_unknown_sp         | 1.94        | 0.002       |
| Bacteria | Firmicutes     | Flavonifractor         | uncultured_Flavonifractor_sp   | 1.94        | 0.001       |
| Bacteria | Firmicutes     | Holdemania             | Holdemania_filiformis          | 2.06        | 0.002       |
| Bacteria | Firmicutes     | Coprococcus            | Coprococcus_comes              | 2.08        | 0.002       |
| Bacteria | Bacteroidetes  | Alistipes              | Alistipes_onderdonkii          | 2.13        | 0.002       |
| Bacteria | Actinobacteria | Collinsella            | Collinsella_unknown_sp         | 2.21        | 0.001       |
